# Supplementary material for: Amyloid conformation-dependent disaggregation revealed by a reconstituted yeast prion system
Source: Research Square preprint supplement (doi:10.21203/rs.3.rs-118491/v1), 2020-12-10
Supplement: Supplementary file 1 [file cd8ab126d730476692fe8a04.docx]

**Supplementary Information**


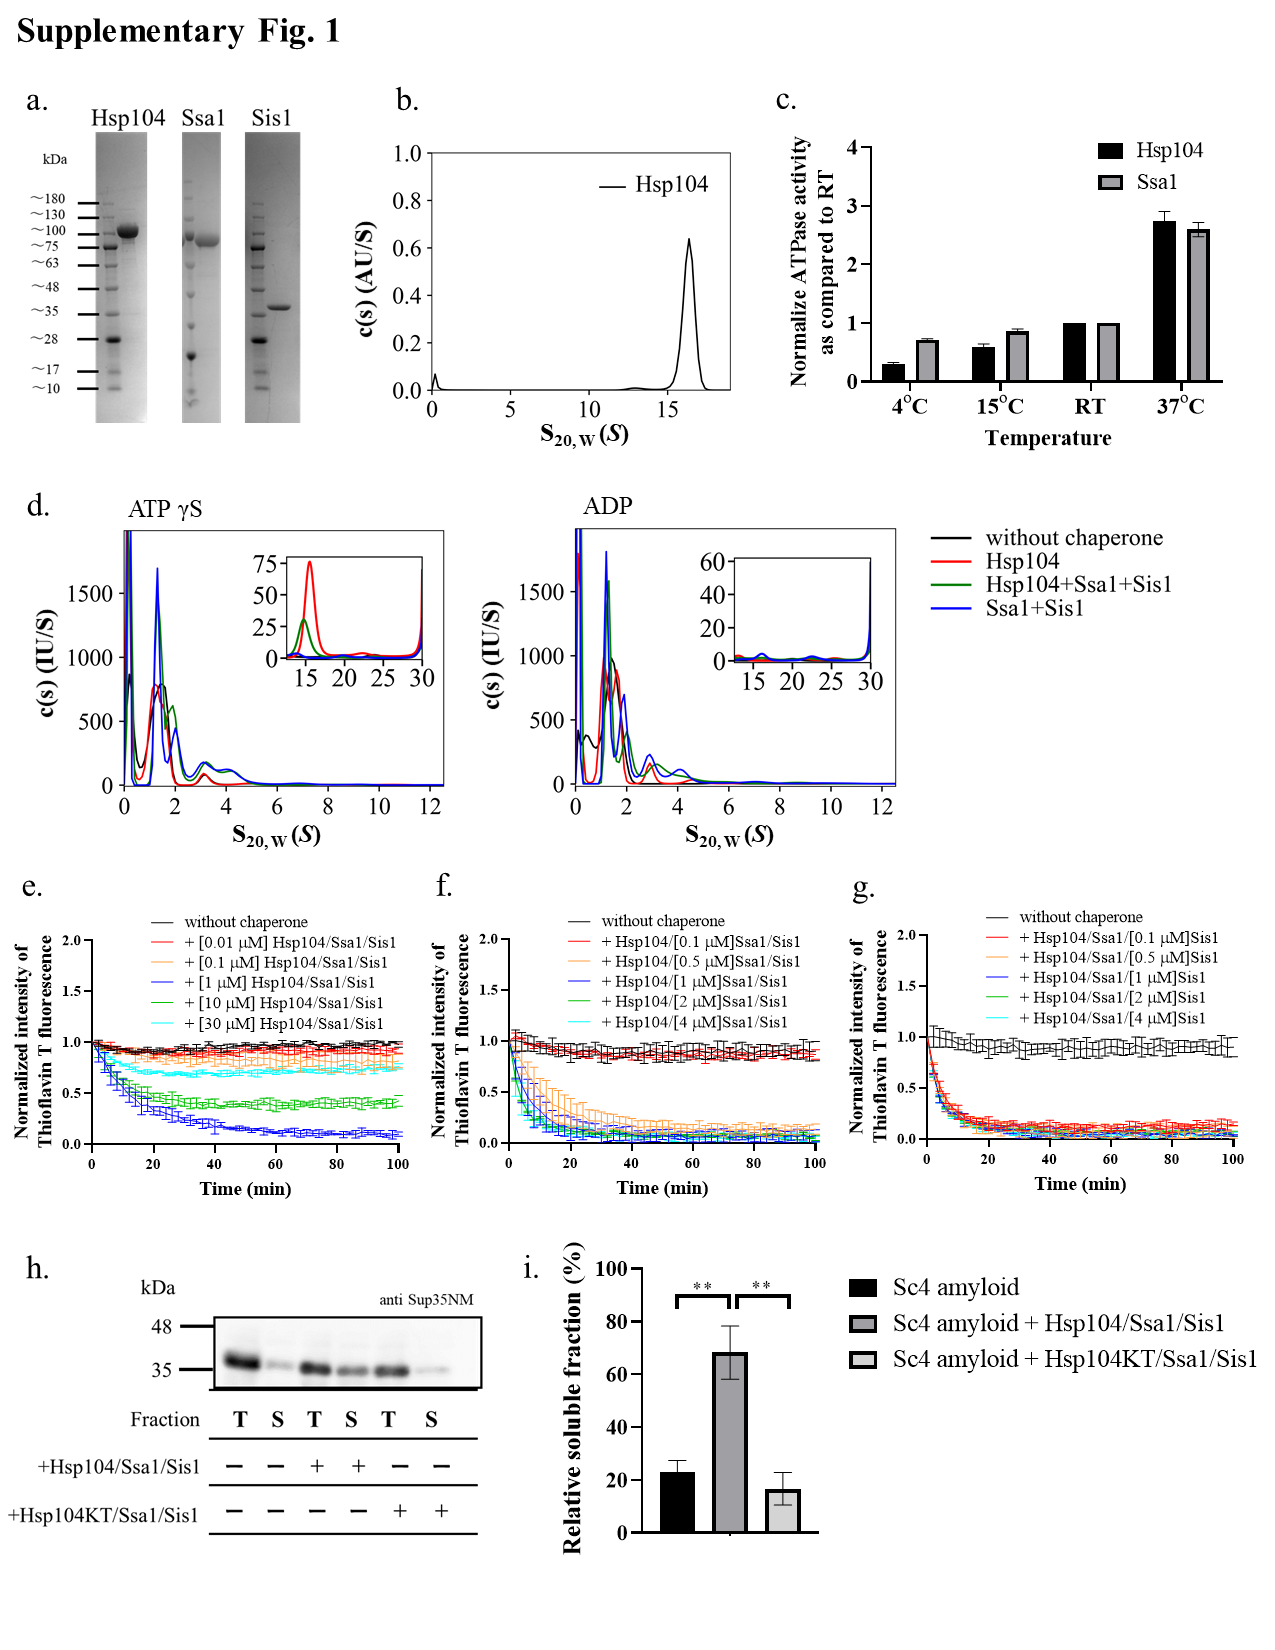


**Supplementary Fig. 1 Sup35NM amyloid is efficiently disaggregated by Hsp104, Ssa1 and Sis1 chaperones. a**, Hsp104, Ssa1, and Sis1 proteins purified in this study were detected by SDS-PAGE. **b**, Sedimentation coefficient distribution of Hsp104 at a concentration of 30 M was obtained by AUC analysis. **c**, ATPase activity of Hsp104 and Ssa1 at 4oC, 15oC, RT, and 37oC. Each activity was normalized by the data at RT. Data were averaged from three independent experiments (*n* = 3). Error bars indicate SD. **d**, 20 M Sup35NM monomer including 20 nM Alexa488 labeled Sup35NM were incubated with 20 M Hsp104, 20 M Ssa1, and 20 M Sis1 in the presence of ATPS (left) and ADP (right) at 20oC. Interactions with Sup35NM with chaperone(s) were investigated by AUC with a fluorescence detection system. The inset shows the range of sedimentation coefficient between 13 and 30 *S*. **e**, 0.5 M Sc4 amyloid was incubated with various concentrations (0.01, 0.1, 1, 10, and 30 M) of Hsp104 in the presence of 2 M Ssa1 and 2 M Sis1. Data were averaged from three independent experiments (*n* = 3). Error bars indicate SD. **f**, 0.5 M Sc4 amyloid was incubated with various concentrations (0.1, 0.5, 1, 2, and 4 M) of Ssa1 in the presence of 1 M Hsp104 and 2 M Sis1. Data were averaged from two independent experiments (*n* = 2). Error bars indicate SD. **g**, 0.5 M Sc4 amyloid was incubated with various concentrations (0.1, 0.5, 1, 2, and 4M) of Sis1 in the presence of 1 M Hsp104 and 2 M Ssa1. Data were averaged from two independent experiments (*n* = 2). Error bars indicate SD. **h**, 0.5 M Sc4 amyloid was incubated with 1 M Hsp104 or Hsp104 KT with 2 M Ssa1, 2 M Sis1 for 2 hours at 30oC. Soluble Sup35NM protein that was disaggregated from Sc4 amyloid was separated by ultracentrifugation. **i**, Quantification of signal intensity of soluble (S) and total amyloid-derived (T) Sup35NM protein in Supplementary Fig. 1h. Relative soluble fraction (S/T) was calculated. Data were averaged from three independent experiments (*n* = 3). Error bars indicate SD. ** *P* < 0.01


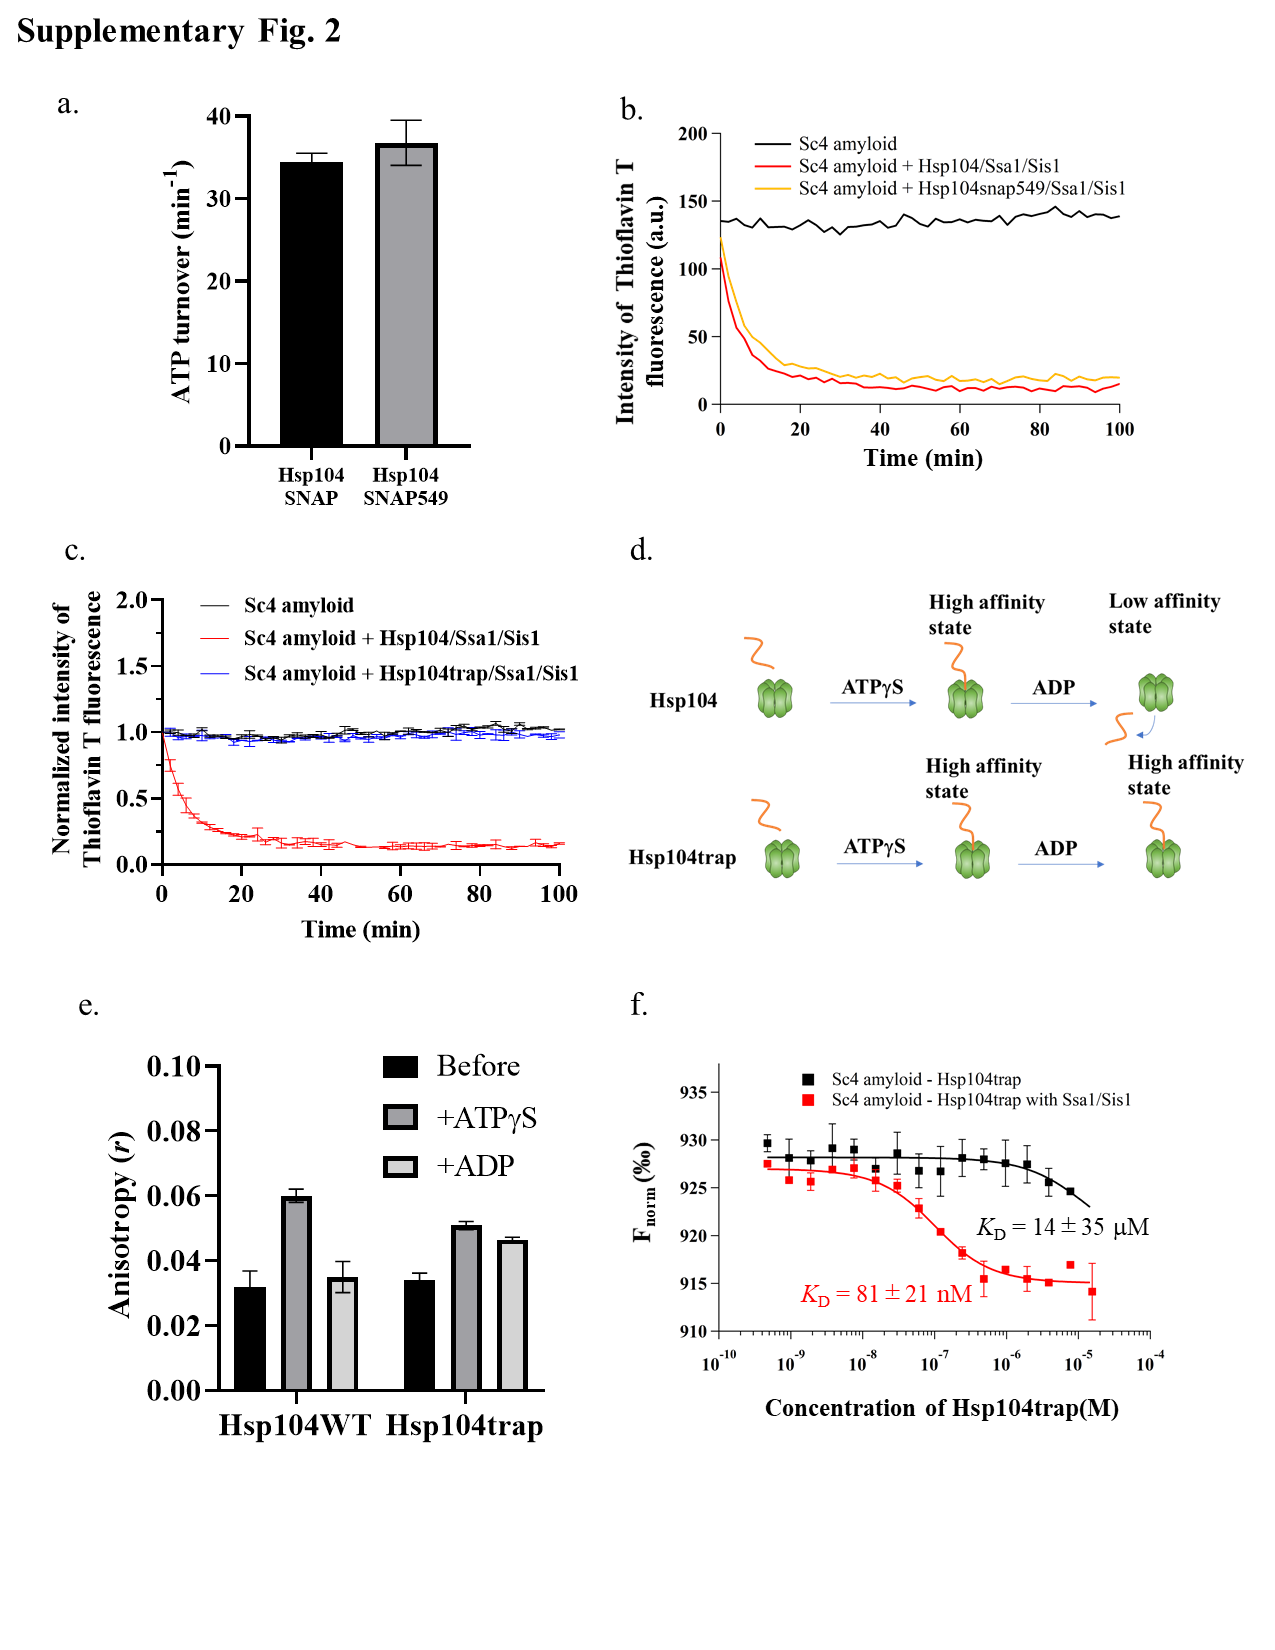


**Supplementary Fig. 2 Activities and interactions of Hsp104-SNAP549 or Hsp104trap-SNAP549 with Sc4 amyloid were analyzed by biophysical methods. a**, ATPase activities of Hsp104-SNAP549 and unlabeled Hsp104-SNAP were compared. Number of ATP turnover indicates consumption of ATP per min. Data were averaged from three independent experiments (*n* = 3). Error bars indicate SD. **b**, Kinetics of disaggregation of Sc4 amyloid by 1 mM Hsp104WT, Hsp104-SNAP and fluorescently labeled Hsp104-SNAP549, with 2 mM Ssa1 and 2 mM Sis1 was monitored by ThT fluorescence. **c**, Disaggregation of Sc4 amyloid was impaired in the presence of Hsp104trap with Ssa1/Sis1. Kinetics of disaggregation of 0.5 M Sc4 amyloid with various combinations of 1 M Hsp104 or Hsp104trap, 2 M Ssa1, 2 M Sis1 was monitored at 30oC by thioflavin T fluorescence. Data were normalized by the initial fluorescence intensities. Data were averaged from three independent experiments (*n* = 3). Error bars indicate SD. **d**, An experimental scheme of Hsp104trap in this study. 0.5 M Sup35NM-Alexa488 monomer was incubated with 5 M Hsp104 WT or Hsp104 trap at 30oC. Fluorescence anisotropy was measured before and after the addition of ATPS, followed by ADP. **e**, Fluorescence anisotropy (*r*) of Sup35NM monomer with Hsp104trap was not reduced after the addition of ADP, indicating Sup35NM monomer is trapped by Hsp104trap. Data were averaged from three independent experiments (*n* = 3). Error bars indicate SD. **f**, Binding affinities of Sc4 amyloid to Hsp104trap in the presence (red) or absence (black) of Ssa1 and Sis1 were measured by microscale thermophoresis.All data were averaged from three independent experiments (*n* = 3). Error bars indicate SD.


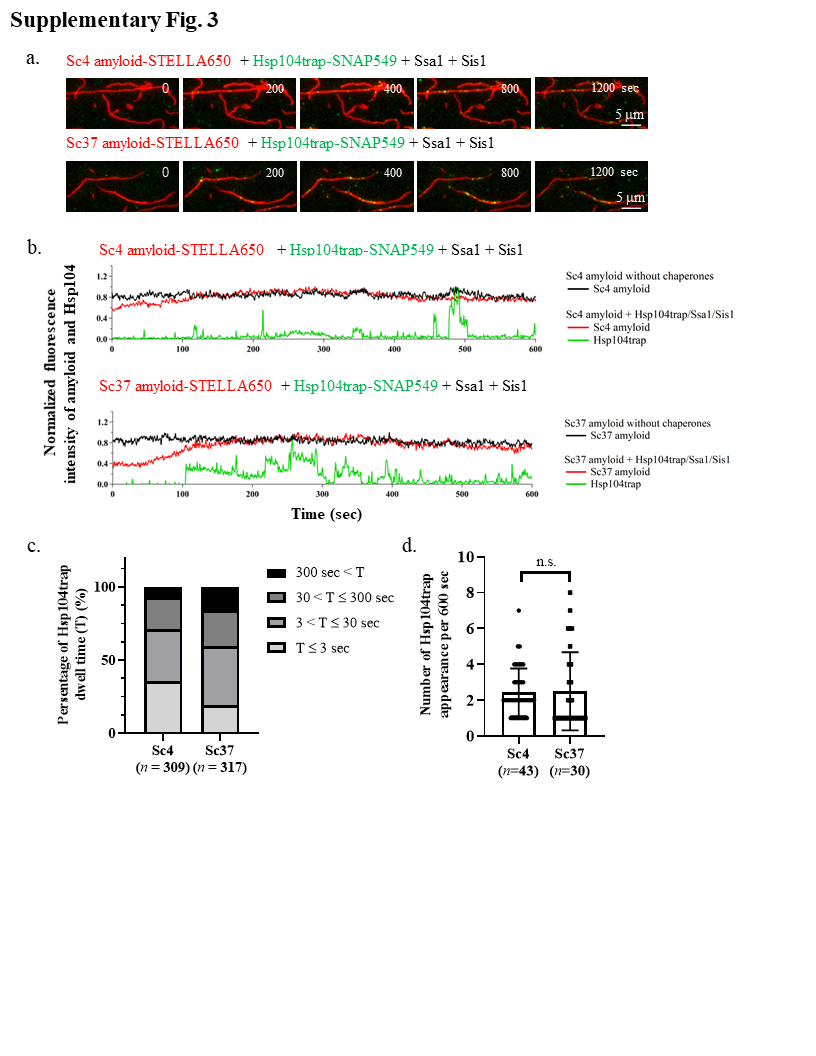


**Supplementary Fig. 3 Hsp104trap is not continuously bound to Sc4 and Sc37 amyloid.** **a**, Representative time-lapse TIRF images of Sc4 or Sc37 amyloid-STELLA650 after 50 nM Hsp104trap-SNAP549, 2 M Ssa1 and 2 M Sis1 were mixed and flowed. Scale bar, 5 m. **b**, Intensity profiles of Sc4 or Sc37 amyloid-STELLA650 and Hsp104trap-SNAP549 fluorescence in a 3x3 pixel area of Supplementary Fig. 3a from 0 to 600 sec. **c**, Dwell time of Hsp104trap-SNAP549 to Sc4 or Sc37 amyloid in Supplementary Fig. 3b. **d**, Number of Hsp104trap appearance on Sc4 and Sc37 amyloids was counted during 600 sec in a 3x3 pixel area. Mean ± SD values are shown in the dot plot, and significance was determined by the two-tailed Student’s t-test.


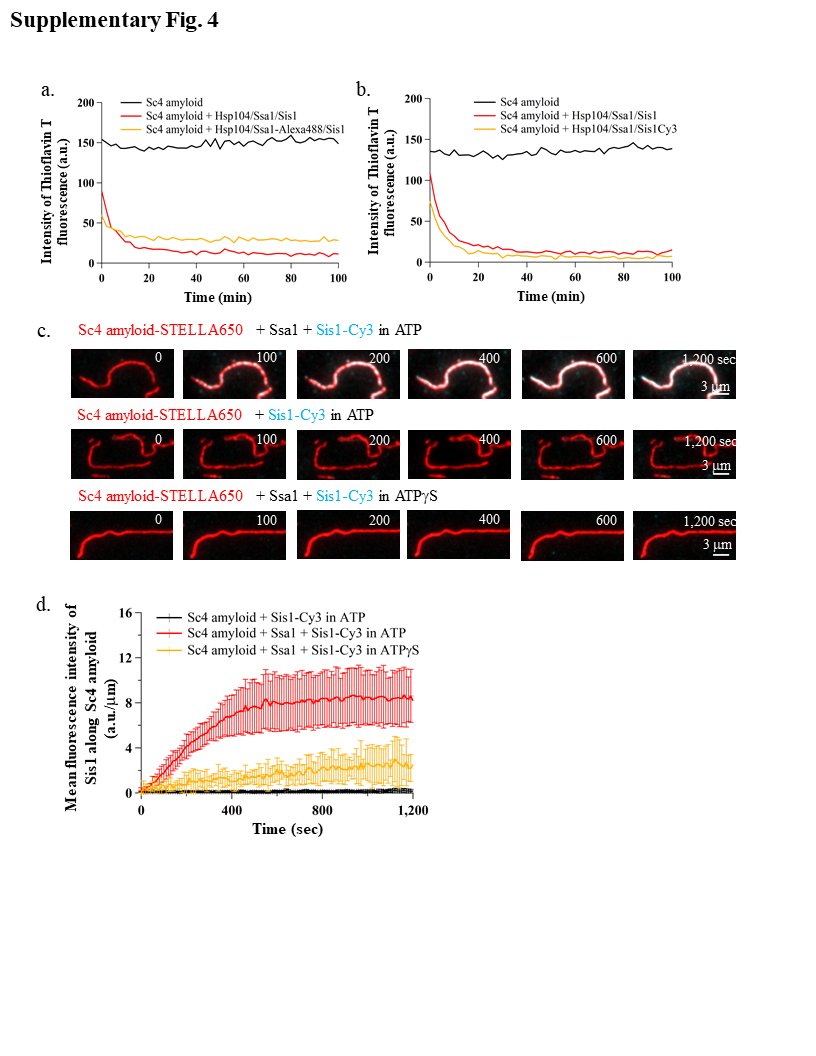


**Supplementary Fig. 4 Sis1 requires Ssa1 and ATP for its binding to Sc4 amyloid.** **a-b**, Kinetics of disaggregation of Sc4 amyloid by (**a**) 2 mM unlabeled Ssa1 and Ssa1-Alexa488, including 1 mM Hsp104 and 2 mM Sis1, (**b**) 2 mM unlabeled Sis1 and Sis1-Cy3, including 1 mM Hsp104 and 2 mM Ssa1, was monitored by ThT fluorescence. **c**, Representative time-lapse TIRF images showing interactions between Sc4 amyloid-STELLA650 and Sis1-Cy3, after Sc4 amyloid-STELLA650, 0.5 M Sis1-Cy3 and 2 M Ssa1 with ATP or ATPS were mixed and flowed. Images were acquired every 10 sec. Scale bar, 3 m. **d**, Kinetics of accumulation of Sis1-Cy3 fluorescence on Sc4 amyloid in the presence or absence of Sis1 with ATP or ATPS. All data were averaged from three independent fibers (*n* = 3). Error bars indicate SD.


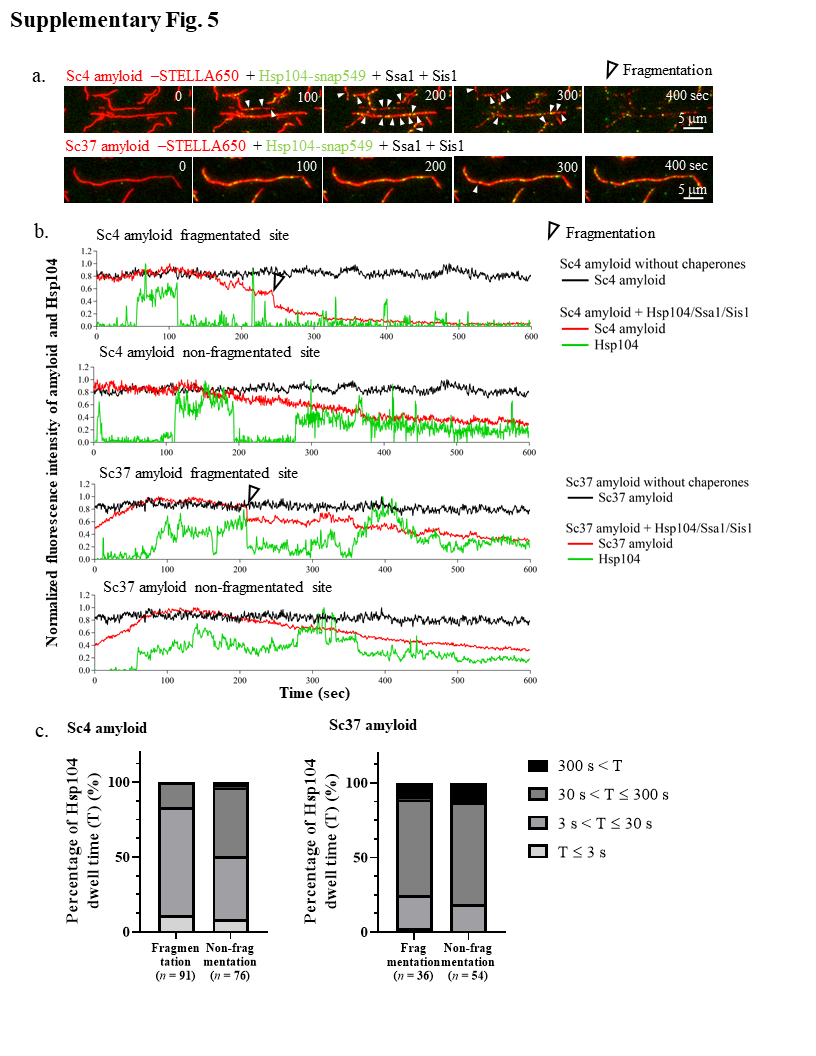


**Supplementary Fig. 5 Fragmentation is frequently observed in disaggregation of Sc4 amyloid but not Sc37 amyloid. a**, Representative time-lapse TIRF images of Sc4 or Sc37 amyloid-STELLA650 and Hsp104-SNAP549, after 1 M Hsp104 including 30 nM Hsp104-SNAP549, 2 M Ssa1 and 2 M Sis1 were mixed and flowed. Images were acquired every 500 msec. Scale bar, 5 m. **b**, Representative intensity profiles of the spots in a 3x3 pixel of Sc4 (top) or Sc37 (bottom) amyloid-STELLA650 (red) and Hsp104-SNAP549 (green) at the sites where Sc4/Sc37 amyloid was fragmented or non-fragmented. White arrows indicate the fragmentation of amyloid. **c**, Dwell time (T) of Hsp104 at the sites where Sc4 (left) or Sc37 (right) amyloid was fragmented or non-fragmented.


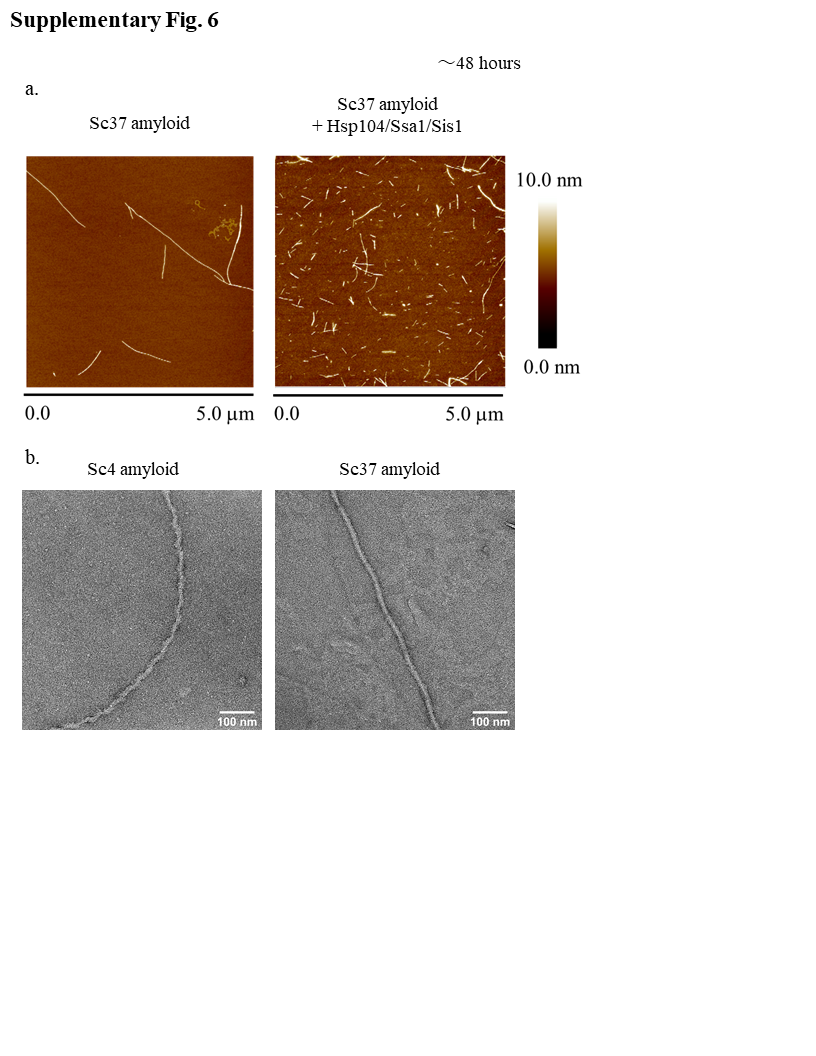


**Supplementary Fig. 6 Sc4 and Sc37 amyloids show morphologically distinct structures.** **a**, Representative AFM images of 0.5 M Sc37 amyloid after incubation with 1 M Hsp104, 2 M Ssa1 and 2 M Sis1 at 30oC for 48 hours. **b**,Representative images of Sc4 and Sc37 amyloid by negative staining with electron microscopy. Scale bar, 100 nm. Sc4 amyloids show wavy structures while Sc37 amyloids exhibit straight structures.


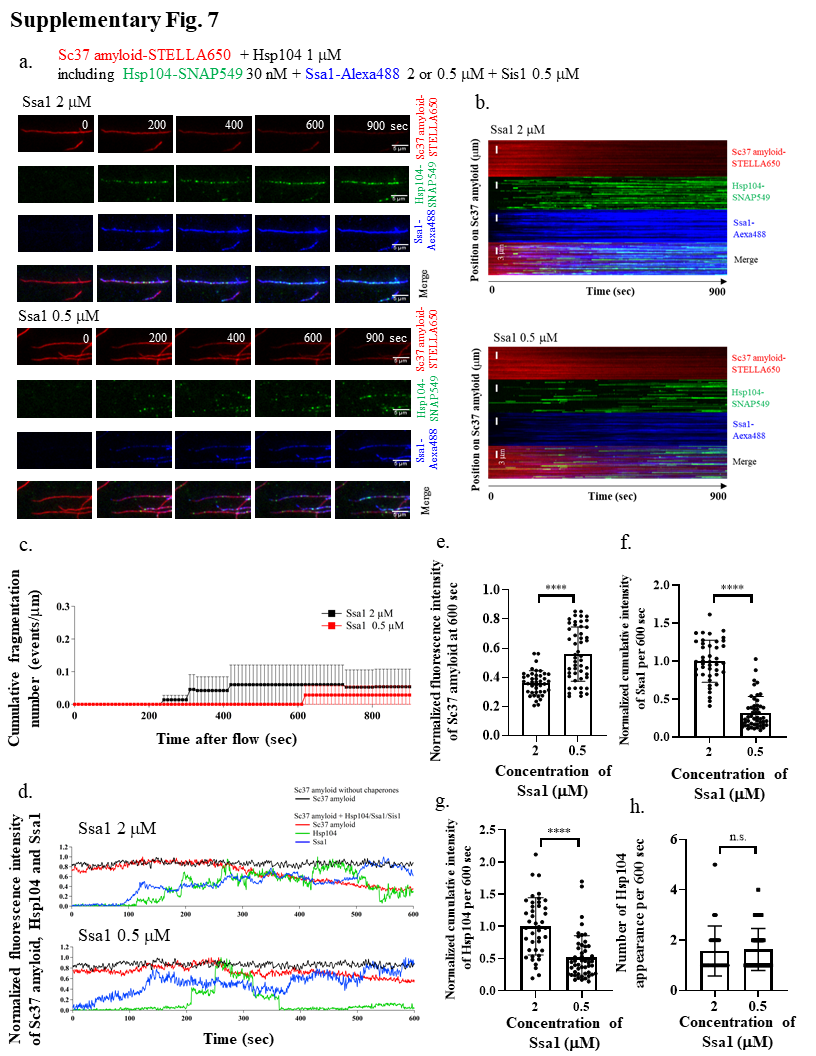


**Supplementary Fig. 7 Dissolution mode of Sc37 amyloid disaggregation is not altered by a low concentration of Ssa1. a**, Representative time-lapse TIRF images showing interactions between Sc37 amyloid-STELLA650, Hsp104-SNAP549 and Ssa1-Alexa488, after 1 M Hsp104 including 30 nM Hsp104-SNAP549, 2 (top) or 0.5 (bottom) M Ssa1-Alexa488 and 0.5 M Sis1 were mixed and flowed. Images were acquired every 500 msec. Scale bar, 5 m. **b**, Kymographs of Sc37 amyloid-STELLA650 from Supplementary Fig. 7a from 0 to 900 sec. Scale bar, 3m. **c**, Analysis of fragmentation rate of Sc37 amyloid. Each data point shows the cumulative number of fragmentation events (per m amyloid) at various time points. Data were averaged from three independent fibers (*n* = 5). Error bars indicate SD. **d**, Representative intensity profiles of the spots in a 3x3 pixel area of Sc37 amyloid-STELLA650 (red), Hsp104-SNAP549 (green) and Ssa1-Alexa488 (blue). **e**, Fluorescence intensity of Sc37 amyloid in a 3x3 pixel area was measured at 600 sec and normalized to that in the same area measured at 0 sec in the presence of 0.5 or 2 mM Ssa1 (*n* = 50 for 0.5 mM Ssa1, *n* = 42 for 2 mM Ssa1). Mean ± SD values are shown in the dot plot, and significance was determined by the two-tailed Student’s t-test. **f-g**, Normalized cumulative fluorescence intensity of (**f**) Ssa1 and (**g**) Hsp104 over all 600 sec period in each Ssa1 concentration. Cumulative intensities of Hsp104 and Ssa1 were normalized by averaged intensities of Hsp104 and Ssa1 in the presence of 2 mM Ssa1, respectively. Mean ± SD values are shown in the dot plot, and significance was determined by the two-tailed Student’s t-test. **h**, Number of Hsp104 appearance on Sc37 amyloid during 600 sec in each Ssa1 concentration. **** *P* < 0.0001. Mean ±SD values are shown in the dot plot, and significance was determined by the two-tailed Student’s t-test.

**Supplementary Video legends**

**Supplementary Video 1. Real-time TIRF imaging analysis of disaggregation of Sc4 amyloid by Hsp104, Ssa1 and Sis1.**
0.5 M STELLA650-labeled Sc4 amyloid was immobilized to the PEG-coated flow-cell. Then, 1 M Hsp104 with or without 2 M Ssa1 and Sis1 were mixed and introduced into the flow-cell. Video playback is 30 frames per sec. Scale bar, 10 m.

**Supplementary Video 2. Dual-color TIRF imaging analysis of Hsp104 binding to Sc4 amyloid.**

0.5 M STELLA650-labeled Sc4 amyloid was immobilized to the PEG-coated flow-cell. Then, 40 nM Hsp104-SNAP549 with or without 2 M Ssa1 and 0.5 M Sis1 were mixed and introduced into the flow-cell. Video playback is 30 frames per sec. Scale bar, 5 m.

**Supplementary Video 3. Dual-color TIRF imaging analysis of Ssa1 binding to Sc4 amyloid.**

0.5 M STELLA650-labeled Sc4 amyloid was immobilized to the PEG-coated flow cell. Then, 2M Ssa1-Alexa488 and 0.5 M Sis1 were mixed and introduced into the flow-cell. Video playback is 30 frames per sec. Scale bar, 5 m.

**Supplementary Video 4. Three-color TIRF imaging analysis of Ssa1 and Sis1 binding to Sc4 amyloid.**

0.5 M STELLA650-labeled Sc4 amyloid was immobilized to the PEG-coated flow cell. Then, 2M Ssa1-Alexa488 and 0.5 M Sis1-Cy3 were mixed and introduced into the flow-cell. Video playback is 30 frames per sec. Scale bar, 5 m.

**Supplementary Video 5. Three-color TIRF imaging analysis of Hsp104 and Ssa1 binding to Sc4 amyloid.**

0.5 M STELLA650-labeled Sc4 amyloid was immobilized to the PEG-coated flow cell. Then, 50 nM Hsp104-SNAP549, 2M Ssa1-Alexa488 and 0.5 M Sis1 were mixed and introduced into the flow-cell. Video playback is 30 frames per sec. Scale bar, 5 m.
